# Supplementary material for: Air cathode of zinc–air batteries: a highly efficient and durable aerogel catalyst for oxygen reduction
Source: Royal Society of Chemistry journal article supplement (doi:10.1039/c8nr07386d), 2018-12-10
Supplement: c8nr07386d1.pdf [file c8nr07386d1.pdf]

## Electronic Supplementary Material

### Air cathode of zinc-air batteries: a highly efficient and durable aerogel catalyst for oxygen reduction

Lijie Zhang,<sup>a</sup> Xianfeng Yang,<sup>b</sup> Rongsheng Cai<sup>a</sup>, Chengmeng Chen<sup>c</sup>, Yanzhi Xia<sup>a</sup>, Huawei Zhang,<sup>d</sup> Dongjiang Yang<sup>\*ae</sup> and Xiangdong Yao<sup>\*e</sup>

#### Experimental Section

**ORR:** For the electrochemical test, 2 mg of the catalyst was dispersed in the mixture of 50  $\mu\text{L}$  of Nafion (5 wt%) solution, 500  $\mu\text{L}$  of ethanol, and 500  $\mu\text{L}$  distilled water. Then a homogenous catalyst ink was obtained by an ultrasonic disperse method. 6  $\mu\text{L}$  of the ink was pipetted onto a glassy carbon disk ( $0.0706\text{ cm}^{-2}$ ). Measurements were performed in a three-electrode equipped with a Pt counter electrode and a Ag/AgCl reference electrode. Cyclic voltammetry (CV) experiments with a sweep rate of  $50\text{ mV s}^{-1}$  were recorded in the potential range of 0 to  $-1.0\text{ V}$  vs. Ag/AgCl. Linear sweep voltammetry (LSV) was performed in  $\text{N}_2$ -saturated or  $\text{O}_2$ -saturated  $0.1\text{ M KOH}$ . Current-voltage curves were recorded at a scan rate of  $10\text{ mV s}^{-1}$  under various electrode rotation rates (225, 400, 625, 900, 1225, 1600, 2025, and 2500 rpm, respectively). The current density was normalized to the geometrical area and the measured potentials vs. Ag/AgCl were converted to a reversible hydrogen electrode (RHE) scale according to the following equation:

$$E_{\text{RHE}} = E_{\text{Ag/AgCl}} + 0.059 * \text{pH} + 0.1976$$

The electron transfer number ( $n$ ) of the sample was calculated from the ring current ( $I_R$ ) and disk current ( $I_D$ ) through the equation:

$$n = \frac{4NI_D}{NI_D + I_R}$$

The peroxide percentage ( $\text{H}_2\text{O}_2\%$ ) was calculated based on the equation:

$$H_2O_2 = \frac{200I_R}{NI_D + I_R}$$

Where  $N = 0.43$ ,  $N$  is the current collection efficiency of the Pt ring.

**Zinc-air batteries:** For a primary zinc-air battery, the air electrode was prepared by uniformly coating the as-prepared catalyst ink onto carbon paper and then drying it at 80 °C for 2 h. The mass loading was 1.25 mg cm<sup>-2</sup> (0.25 mg cm<sup>-2</sup> for 20% Pt/C). A zinc plate was used as the anode. Both electrodes were assembled into a home-built electrochemical battery with the electrolyte being 6 M KOH. Polarization data ( $V-i$ ) were collected using linear sweep voltammetry at a scan rate of 10 mV s<sup>-1</sup>.

The specific capacity normalized to the mass of consumed Zn was calculated based on the equation:

$$\text{The specific capacity} = \frac{\text{current} * \text{serve hours}}{\text{weight of consumed zinc}}$$

The gravimetric energy density normalized to the mass of consumed Zn was calculated based on the equation:

$$\text{The gravimetric energy density} = \frac{\text{current drain} * \text{serve hours} * \text{average discharge voltage}}{\text{weight of consumed zinc}}$$

The power densities of Zn-air batteries were calculated based on the equation:  $P=U*j$  ( $P$  is power densities of zinc-air batteries (mW cm<sup>-2</sup>),  $U$  is the battery voltages (V), and  $j$  is the current densities of batteries (mA cm<sup>-2</sup>)).

## DFT Calculations

The density functional theory (DFT) calculations were carried out using the Vienna ab Initio Simulation package (VASP).<sup>1, 2</sup> The ion–electron interactions were described by the projector plane wave (PAW) approach. Electron exchange–correlations were represented by the functional of Perdew, Burke and Ernzerhof (PBE) of generalized gradient approximation (GGA).<sup>3</sup> To ensure the convergence for total energy, all calculations were performed using a plane-wave cutoff energy of 400eV with Fermi-level smearing of 0.1eV and Monkhorst-Pack grid (3×2×2) was used for k-point sampling. Besides, the convergence threshold of energy and forces were set to be 1×10<sup>-5</sup> eV and 0.02 eV/Å, respectively. The adsorption energy ( $E_{\text{ads}}$ ) of ORR intermediates on catalysts are calculated as

$$E_{\text{ads}(\text{intermediate})} = E_{(\text{intermediate}/\text{catalyst})} - (E_{\text{catalyst}} + E_{\text{intermediate}})$$

where  $E_{(\text{intermediate}/\text{catalyst})}$  and  $E_{\text{catalyst}}$  are the total energies for the optimized equilibrium configurations of catalyst with or without intermediate, respectively, and  $E_{\text{intermediate}}$  is the energy of the intermediate in its ground state.

Based on these definitions, the negative  $E_{\text{ads}}$  values correspond to the exothermic stably adsorption processes.

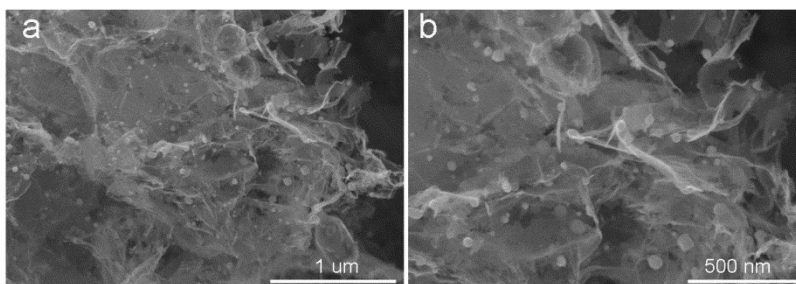

**Figure S1.** (a) SEM image of the as-synthesized  $\text{Co}_3\text{O}_4@\text{Co/N-r-GO}$  and (b) its amplified SEM image.

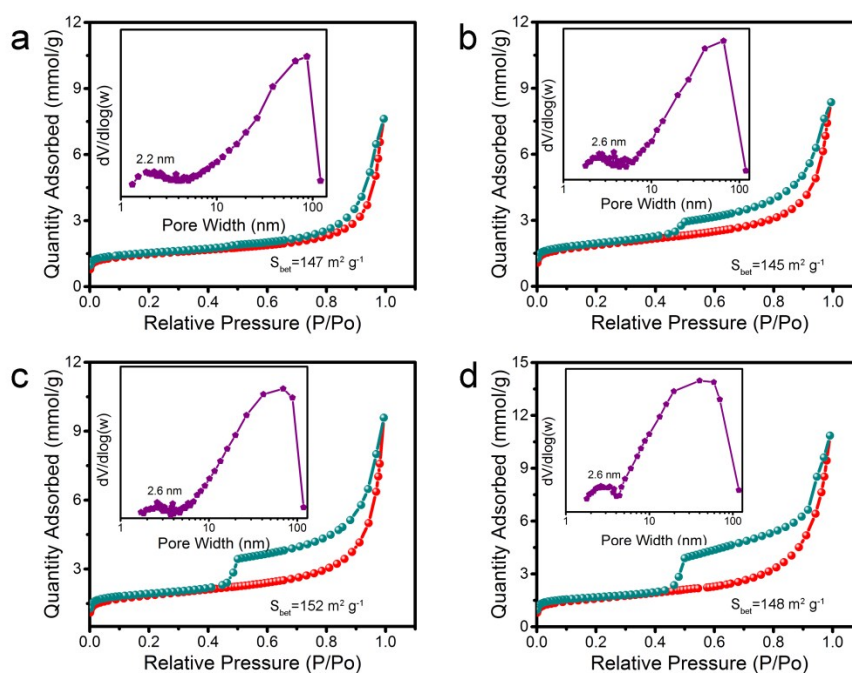

**Figure S2.** Nitrogen adsorption-desorption isotherms of  $\text{Co}_3\text{O}_4@\text{Co/N-r-GO-4}$  (a),  $\text{Co}_3\text{O}_4@\text{Co/N-r-GO-7}$  (b),  $\text{Co}_3\text{O}_4@\text{Co/N-r-GO-15}$  (c) and  $\text{Co}_3\text{O}_4@\text{Co/N-r-GO-20}$  (d) and their corresponding the pore size distributions (the inset in a, b, c, and d, respectively).

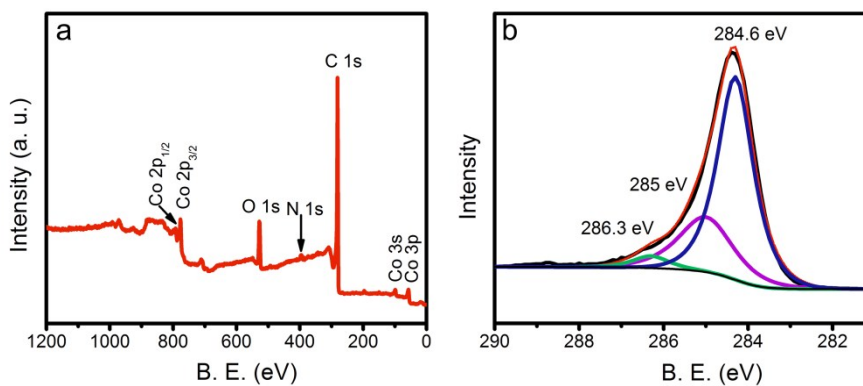

**Figure S3.** XPS survey and high-resolution XPS spectra for the as-synthesized  $\text{Co}_3\text{O}_4@\text{Co/N-r-GO-10}$ .

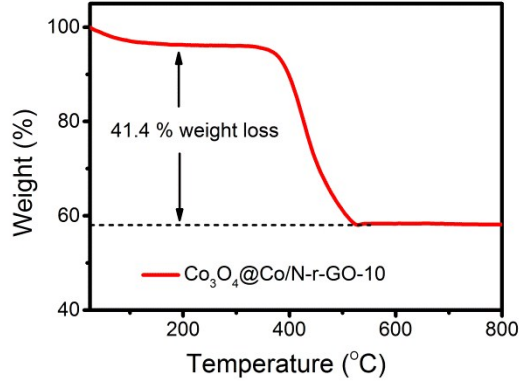

**Figure S4.** TGA weight change curves of  $\text{Co}_3\text{O}_4@\text{Co}/\text{N-r-GO-10}$  tested in air with a ramp rate of  $10^\circ\text{C}/\text{min}$ .

As shown in Fig S4, the weight retention is 58.6%. That is to say, after being decomposed at  $800^\circ\text{C}$  in air, 1 g sample contains 0.586 g  $\text{Co}_3\text{O}_4$ , which includes the pristine  $\text{Co}_3\text{O}_4$  in the sample and the  $\text{Co}_3\text{O}_4$  generated from the oxidation of Co. The oxidation of Co increases the weight by 26.5%. Thus, taking 1 g sample for example, the following equation can be obtained:

$$m_{\text{Co}_3\text{O}_4} + 1.265 * m_{\text{Co}} = 0.586 \text{ (g)} \quad (1)$$

where  $m_{\text{Co}_3\text{O}_4}$  and  $m_{\text{Co}}$  are the mass (g) of  $\text{Co}_3\text{O}_4$  and Co in 1 g sample.

In addition, the inductively coupled plasma (ICP) measurement was also performed to investigate the total mass of Co elements in sample. 1 g sample was dissolved by nitric acid for ICP measurement. The ICP result demonstrates that the total mass of Co element in sample is 0.461 g, which includes the mass of Co element in both Co and  $\text{Co}_3\text{O}_4$ . Considering that the mass ratio of Co element in  $\text{Co}_3\text{O}_4$  is 73%, we can obtain the following equation:

$$0.73 * m_{\text{Co}_3\text{O}_4} + m_{\text{Co}} = 0.461 \text{ (g)} \quad (2)$$

where  $m_{\text{Co}_3\text{O}_4}$  and  $m_{\text{Co}}$  are the mass (g) of  $\text{Co}_3\text{O}_4$  and Co in 1 g sample.

Consequently, based on equation (1) and (2), the mass of  $\text{Co}_3\text{O}_4$  and Co in 1g sample is 0.438 and 0.032 g, respectively. Therefore, the percentage of  $\text{Co}_3\text{O}_4$  and Co in the hybrid is 3.2% and 43.8%, respectively.

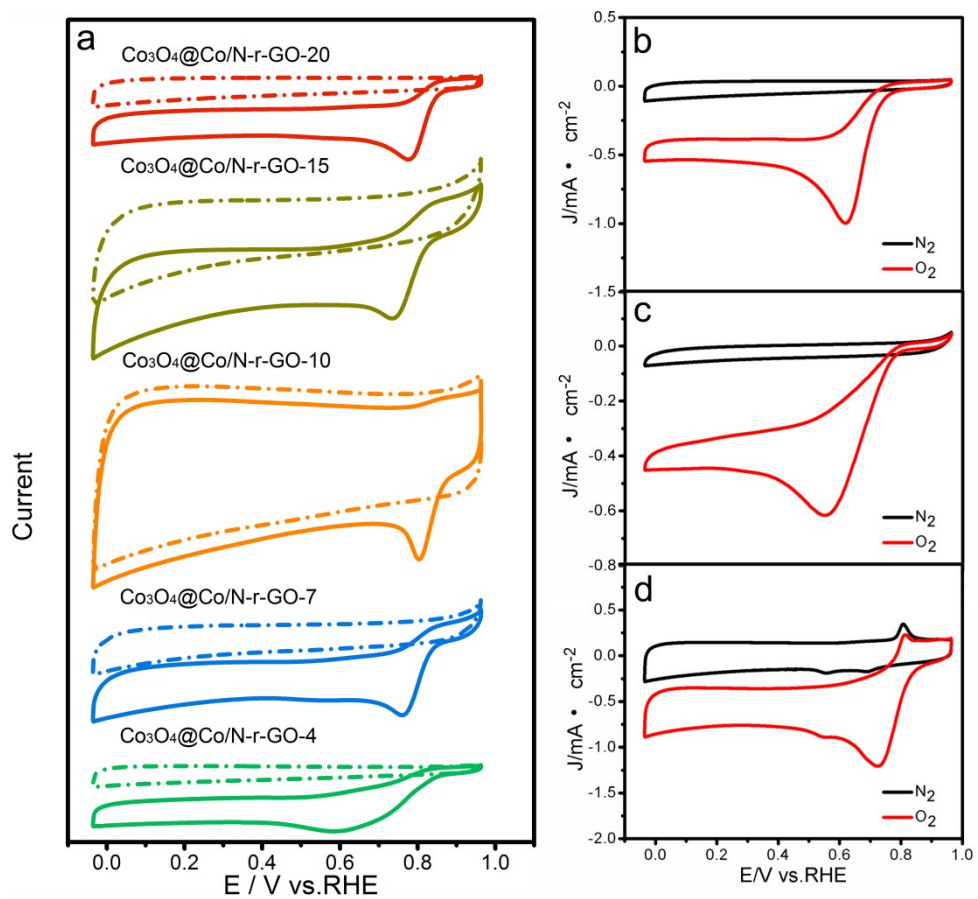

**Figure S5.** CV curves of  $\text{Co}_3\text{O}_4@\text{Co}/\text{N-r-GO-x}$  (a),  $\text{Co}_3\text{O}_4@\text{Co}/\text{r-GO-10}$  (b),  $\text{Co}_3\text{O}_4@\text{Co}$  (c) and  $\text{N-r-GO}$  (d).

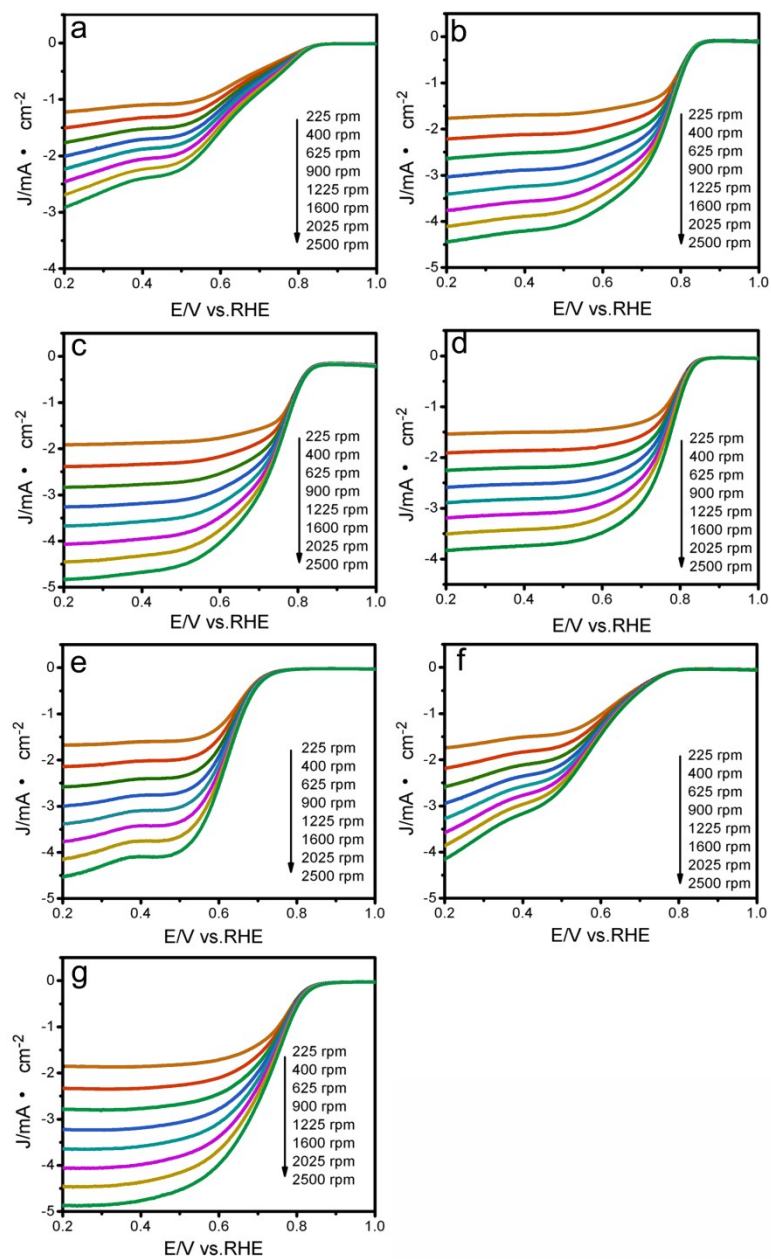

**Figure S6.** LSVs at different rotation speeds (from 225 to 2500 rpm) of  $\text{Co}_3\text{O}_4@\text{Co}/\text{N-r-GO-4}$  (a),  $\text{Co}_3\text{O}_4@\text{Co}/\text{N-r-GO-7}$  (b),  $\text{Co}_3\text{O}_4@\text{Co}/\text{N-r-GO-15}$  (c),  $\text{Co}_3\text{O}_4@\text{Co}/\text{N-r-GO-20}$  (d),  $\text{Co}_3\text{O}_4@\text{Co}/\text{r-GO-10}$  (e),  $\text{Co}_3\text{O}_4@\text{Co}$  (f) and N-r-GO (g) and in 0.1 M KOH aqueous solution saturated with  $\text{O}_2$ .

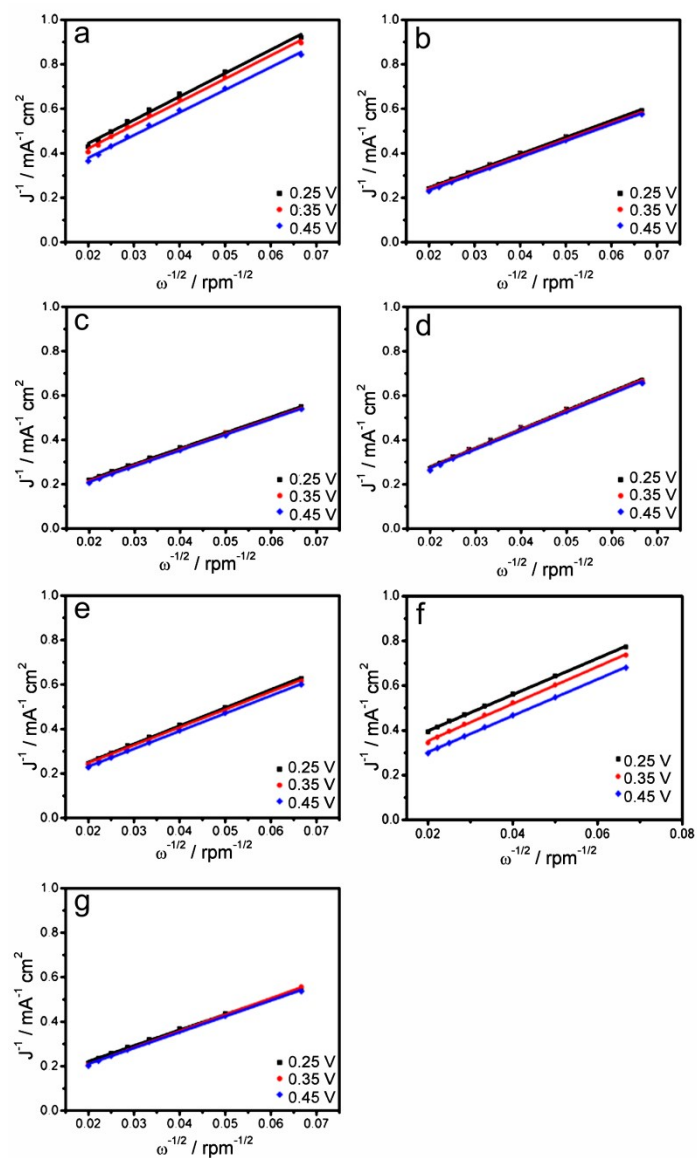

**Figure S7.** K-L plots at different potentials for RDE curves of  $\text{Co}_3\text{O}_4@\text{Co}/\text{N-r-GO-4}$  (a),  $\text{Co}_3\text{O}_4@\text{Co}/\text{N-r-GO-7}$  (b),  $\text{Co}_3\text{O}_4@\text{Co}/\text{N-r-GO-15}$  (c),  $\text{Co}_3\text{O}_4@\text{Co}/\text{N-r-GO-20}$  (d),  $\text{Co}_3\text{O}_4@\text{Co}/\text{r-GO-10}$  (e),  $\text{Co}_3\text{O}_4@\text{Co}$  (f) and N-r-GO (g) in 0.1 M KOH aqueous solution saturated with  $\text{O}_2$ .

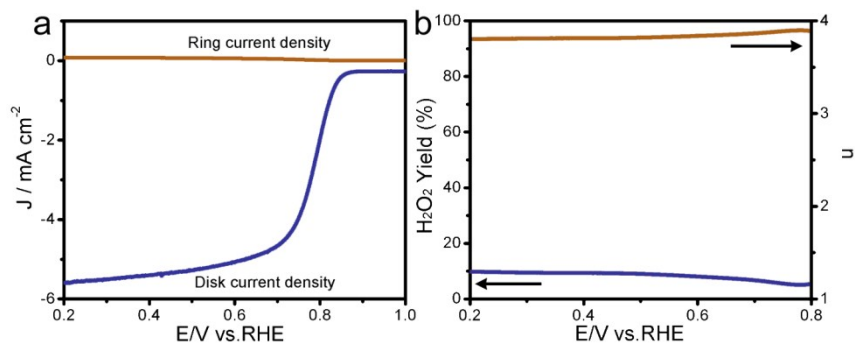

**Figure S8.** (a) LSVs curves of  $\text{Co}_3\text{O}_4@\text{Co}/\text{N-r-GO-10}$  obtained by RRDE and (b) the corresponding  $\text{H}_2\text{O}_2$  yield plots (blue line) and electron transfer number (brown line).

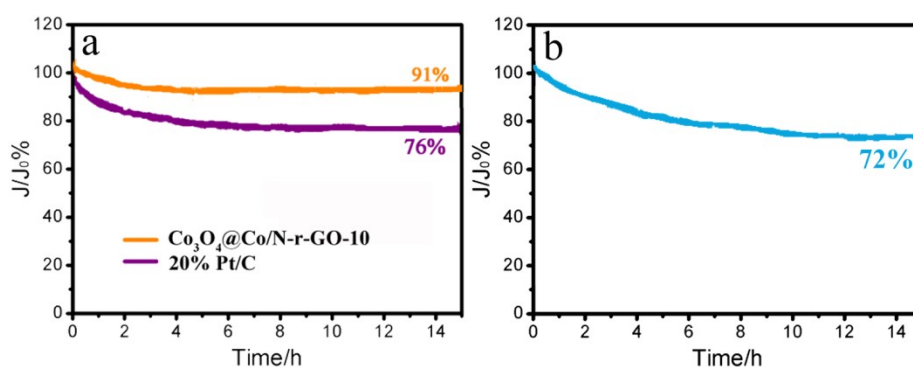

**Figure S9.** (a) Long-term stability test of  $\text{Co}_3\text{O}_4@\text{Co}/\text{N-r-GO-10}$  in comparison with commercial 20% Pt/C for 15 h at 0.27 V in 0.1 M  $\text{O}_2$ -saturated KOH. (b) Long-term stability test of the sample without carbon layers for 15 h at 0.27 V in 0.1 M  $\text{O}_2$ -saturated KOH

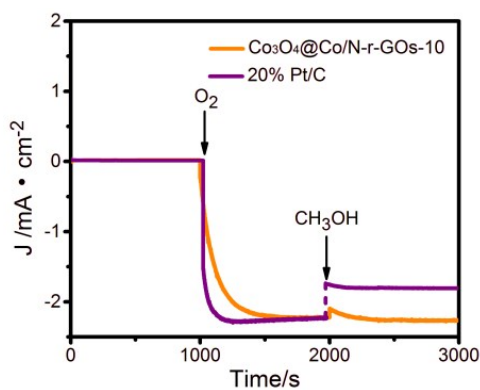

**Figure S10.** Methanol crossover resistance test of  $\text{Co}_3\text{O}_4@\text{Co}/\text{N-r-GO-10}$  and 20% Pt/C at 0.7 V in 0.1 M KOH.



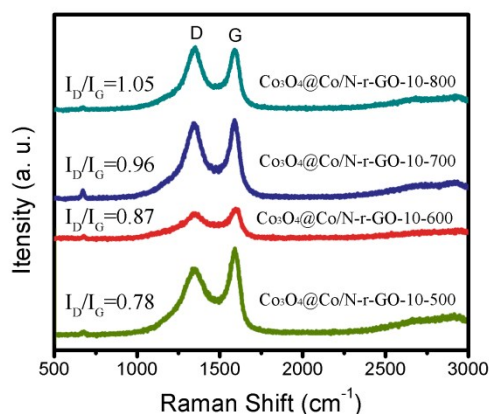

**Figure S11.** Raman spectroscopy of  $\text{Co}_3\text{O}_4@\text{Co/N-r-GO-10-T}$  ( $T = 500, 600, 700$  and  $800$  °C).

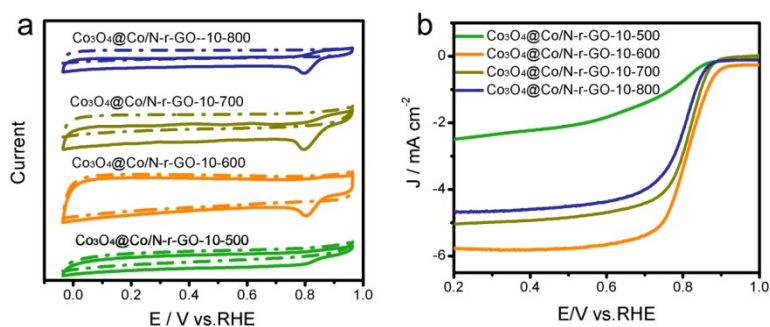

**Figure S12.** CV curves (a) and LSV curves at 1600 rpm (b) of  $\text{Co}_3\text{O}_4@\text{Co/N-r-GO-10}$  pyrolyzed at different temperature ( $\text{Co}_3\text{O}_4@\text{Co/N-r-GO-10-T}$ ,  $T=500, 600, 700, 800$  °C).

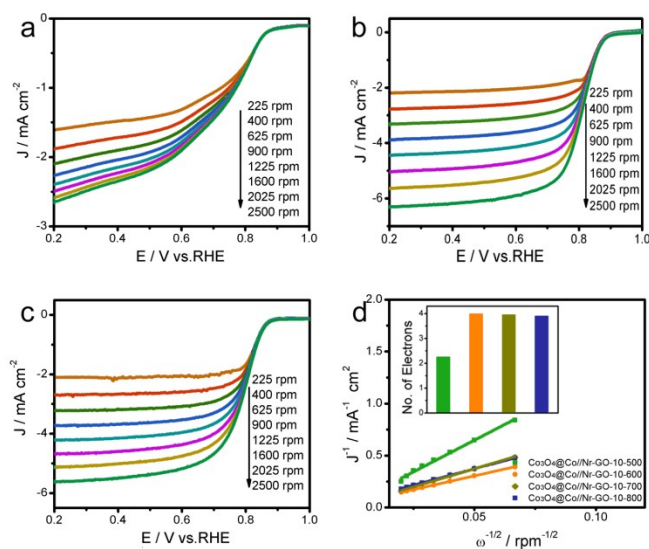

**Figure S13.** LSVs at different rotation speeds (from 225 to 2500 rpm) of  $\text{Co}_3\text{O}_4@\text{Co/N-r-GO-10-500}$  (a),  $\text{Co}_3\text{O}_4@\text{Co/N-r-GO-10-700}$  (b) and  $\text{Co}_3\text{O}_4@\text{Co/N-r-GO-10-800}$  (c); (d) K-L plots for  $\text{Co}_3\text{O}_4@\text{Co/N-r-GO-10-T}$  obtained from LSVs at 0.35 V and the number of electrons respectively (inset).

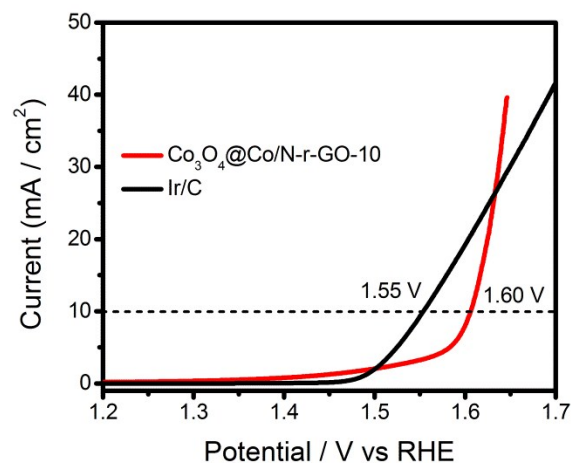

**Figure S14.** The OER activity of  $\text{Co}_3\text{O}_4@\text{Co}/\text{N-r-GO-10}$  and commercial Ir/C.

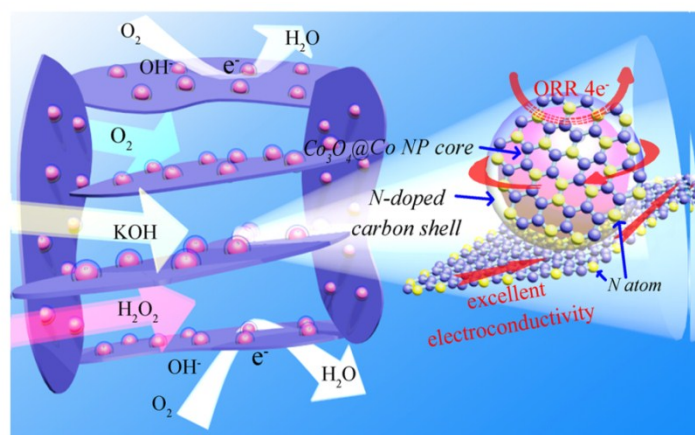

**Figure S15.** Illustration of the proposed reaction mechanism for ORR over the  $\text{Co}_3\text{O}_4@\text{Co}/\text{N-r-GO-10}$

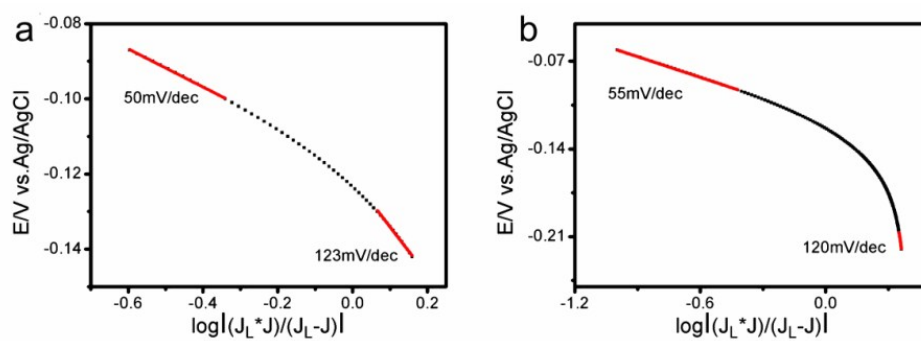

**Figure S16.** Linear fitting of Tafel plots at low and high over potentials regions for  $\text{Co}_3\text{O}_4@\text{Co}/\text{N-r-GO-10}$  (a) and 20% Pt/C (b) in 0.1 M KOH aqueous solution saturated with  $\text{O}_2$ .

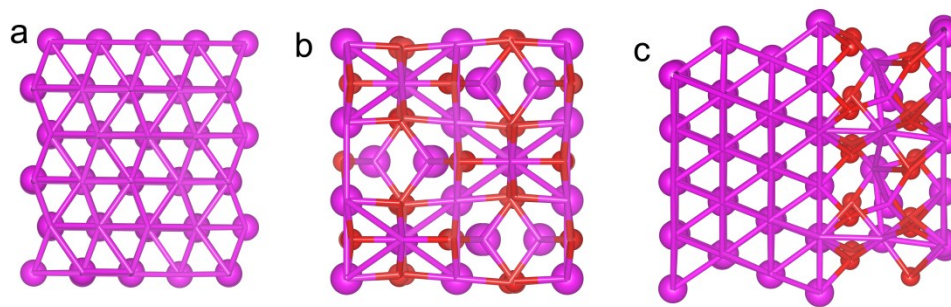

**Figure S17.** The optimized structural representations of Co (a),  $\text{Co}_3\text{O}_4$  (b) and  $\text{Co@Co}_3\text{O}_4$  (c).

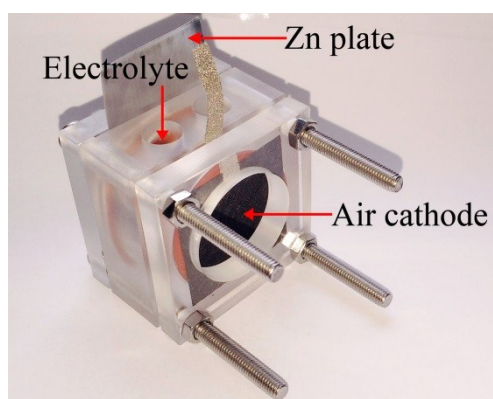

**Figure S18.** Digital image of the home-made ZABs.

**Table S1.** ORR performances of the samples obtained in this article.

| Sample                                       | $E_{\text{onset}}$<br>(V) | $E_{1/2}$<br>(V) | $i_{\text{limiting}}$<br>(mA cm <sup>-2</sup> ) | $n$ at 0.35 V | $J_k$<br>(mA cm <sup>-2</sup> ) |
|----------------------------------------------|---------------------------|------------------|-------------------------------------------------|---------------|---------------------------------|
| 20% Pt/C                                     | 0.98                      | 0.81             | -5.8                                            | 3.99          | 40                              |
| Co <sub>3</sub> O <sub>4</sub> @Co/N-r-GO-10 | 0.93                      | 0.80             | -5.4                                            | 3.98          | 38                              |
| Co <sub>3</sub> O <sub>4</sub> @Co/N-r-GO-4  | 0.87                      | 0.62             | -2.44                                           | 2.70          | 12                              |
| Co <sub>3</sub> O <sub>4</sub> @Co/N-r-GO-7  | 0.88                      | 0.75             | -3.8                                            | 3.82          | 15                              |
| Co <sub>3</sub> O <sub>4</sub> @Co/N-r-GO-15 | 0.89                      | 0.74             | -4.1                                            | 3.94          | 19                              |
| Co <sub>3</sub> O <sub>4</sub> @Co/N-r-GO-20 | 0.90                      | 0.75             | -3.2                                            | 3.33          | 14                              |
| N-r-GO                                       | 0.90                      | 0.71             | -4.1                                            | 3.81          | 25                              |
| Co <sub>3</sub> O <sub>4</sub> @Co           | 0.81                      | 0.55             | -3.1                                            | 3.34          | 15                              |
| Co <sub>3</sub> O <sub>4</sub> @Co/r-GO-10   | 0.80                      | 0.61             | -3.8                                            | 3.52          | 20                              |

**Table S2.** A survey of primary ZABs with several key parameters extracted from the literature.

| Reference                                                                   | Catalysts                                                           | Loading<br>(mg/cm <sup>2</sup> ) | Voltage                           | Durability                       |
|-----------------------------------------------------------------------------|---------------------------------------------------------------------|----------------------------------|-----------------------------------|----------------------------------|
| <b>This work</b>                                                            | Co <sub>3</sub> O <sub>4</sub> @Co/N-r-<br>GO-10                    | 1.25                             | 1.38 V @ 1 mA cm <sup>-2</sup>    | 60 h @ 1 mA cm <sup>-2</sup>     |
|                                                                             |                                                                     |                                  | 1.30 V @ 5 mA cm <sup>-2</sup>    | 60 h @ 5 mA cm <sup>-2</sup>     |
| <b>Adv. Funct. Mater.</b><br><b>2016, 26, 4397-4404</b>                     | Co@NG-acid                                                          | 1.08                             | 1.30 V @ 10 mA cm <sup>-2</sup>   | 14 h @ 10 mA cm <sup>-2</sup>    |
|                                                                             |                                                                     |                                  | 1.20 V @ 50 mA cm <sup>-2</sup>   | 4.5 h @ 50 mA cm <sup>-2</sup>   |
| <b>Angew. Chem. Int.</b><br><b>Ed. 2015, 54, 9654-</b><br><b>9658</b>       | NCNT/CoO-NiO-<br>NiCo                                               | 0.53                             | 1.20 V @ 7 mA cm <sup>-2</sup>    | 40000 s @ 7 mA cm <sup>-2</sup>  |
|                                                                             |                                                                     |                                  | 1.13 V @ 20 mA cm <sup>-2</sup>   | 30000 s @ 20 mA cm <sup>-2</sup> |
|                                                                             |                                                                     |                                  |                                   | 6000 s @ 35 mA cm <sup>-2</sup>  |
| <b>ACS Appl. Mater.</b><br><b>Interfaces 2015, 7,</b><br><b>21138-21149</b> | Co <sub>3</sub> O <sub>4</sub> /N-Doped<br>Graphene                 | 1                                | ~ 1.25 V @ 10 mA cm <sup>-2</sup> | > 30 h @ 10 mA cm <sup>-2</sup>  |
| <b>ACS Appl. Mater.</b><br><b>Interfaces 2015, 7,</b><br><b>17782-17791</b> | Ag <sub>50</sub> Cu <sub>50</sub>                                   | Not mention                      | ~ 1.13 V @ 20 mA cm <sup>-2</sup> | 40 h @ 20 mA cm <sup>-2</sup>    |
| <b>ACS Catal. 2015, 5,</b><br><b>1445-1452</b>                              | CuPt-NC                                                             | 2                                | ~ 1.30 V @ 1 mA cm <sup>-2</sup>  | 14 h @ 20 mA cm <sup>-2</sup>    |
| <b>Nat. Commun.</b><br><b>2013,4.1805-1812</b>                              | CoO/N-CNT                                                           | 1                                | ~ 1.33 V @ 5 mA cm <sup>-2</sup>  | 22 h @ 5 mA cm <sup>-2</sup>     |
|                                                                             |                                                                     |                                  | ~ 1.2 V @ 20 mA cm <sup>-2</sup>  | 12 h @ 50 mA cm <sup>-2</sup>    |
| <b>ACS Nano 2015, 9,</b><br><b>6493-6501</b>                                | Carbon coated                                                       | Not mention                      | ~ 1.1 V @ 100 mA cm <sup>-2</sup> | > 60 h @ 100 mA cm <sup>-2</sup> |
|                                                                             | CuFe                                                                |                                  | ~ 1.22 V @ 25 mA cm <sup>-2</sup> | > 60 h @ 25 mA cm <sup>-2</sup>  |
| <b>Adv. Energy Mater.</b><br><b>2016, 1601052-</b><br><b>1601058</b>        | Mn <sub>x</sub> Co <sub>3-x</sub> O <sub>4</sub> /<br>N-Ketjenblack | Not mention                      | ~ 1.20 V @ 20 mA cm <sup>-2</sup> | > 10 h @ 20 mA cm <sup>-2</sup>  |
| <b>J. Mater. Chem. A,</b><br><b>2016, 4, 8602-8609</b>                      | N,P, Fe tri-doped<br>porous carbon                                  | Not mention                      | ~ 1.38 V @ 1 mA cm <sup>-2</sup>  | 100 min @ 1 mA cm <sup>-2</sup>  |
|                                                                             |                                                                     |                                  | ~ 1.29 V @ 10 mA cm <sup>-2</sup> | 100 min @ 10 mA cm <sup>-2</sup> |

## Reference

1. G. Kresse, J. Furthmüller, *Phys. Rev. B* **1996**, *54*, 11169.
2. G. Kresse, J. Furthmüller, *Computational Mater. Sci.* **1996**, *6*, 15.
3. J. P. John, K. Burke, M. Ernzerhof, *Phys. Rev. Lett.* **1996**, *77*, 3865.
